# Supplementary material
Source: PubMed Central journal article supplement (PMC3923305)
Supplement: NIHMS550419-supplement-2.pdf [file NIHMS550419-supplement-2.pdf]

# Supplementary figure 1

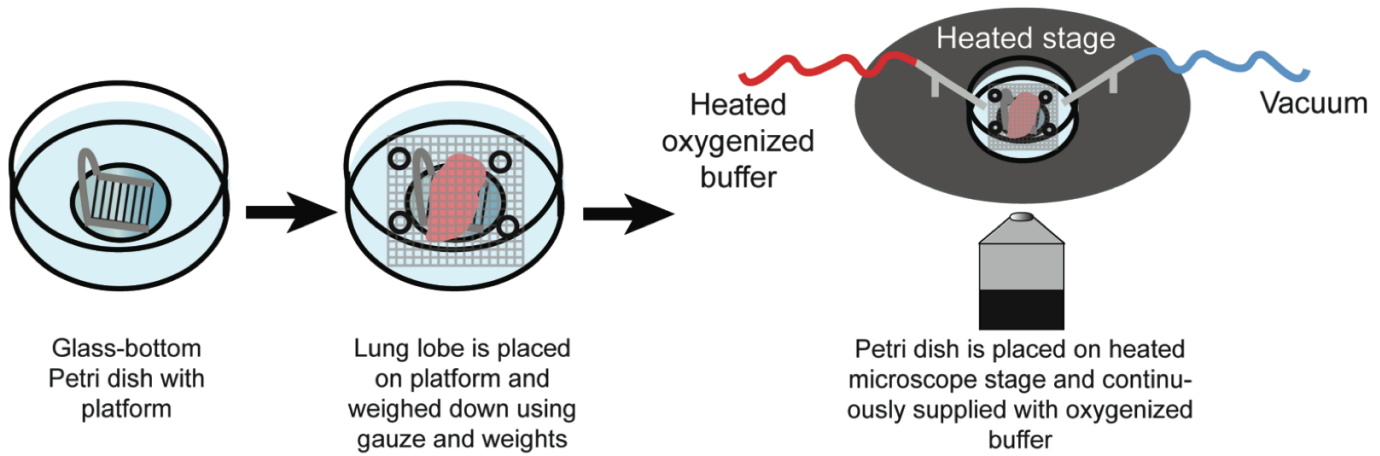

**Figure S1: Schematic diagram representing the platform used for imaging of lung explants using an inverted microscope setup.** This platform is composed of a slightly raised apparatus that is then placed on a glass bottom microwell dish (Mat Tek Corporation). The imaging platform is enclosed in a chamber maintained at 37°C by warmed air. Pre-warmed phenol-free PRMI 1640 (Lonza) is circulated via a pump into the imaging dish (Bioscience Tools), while being continuously supplied with a 95% oxygen/5% CO<sub>2</sub> mixture.

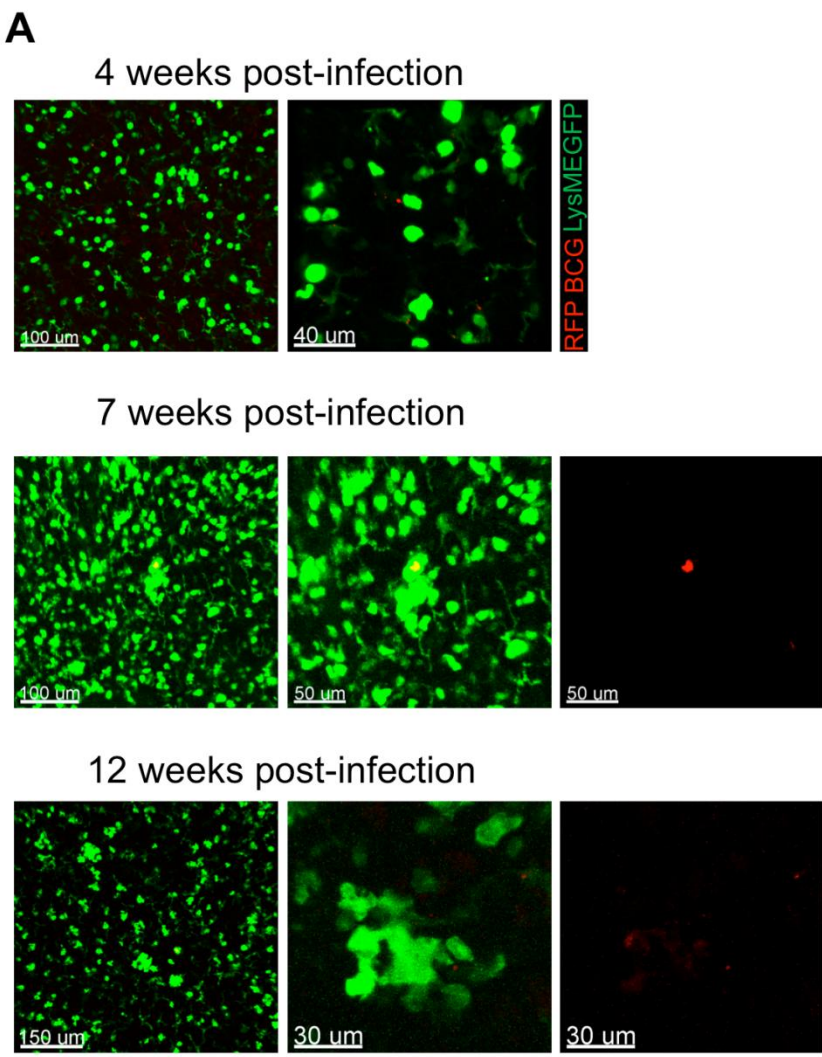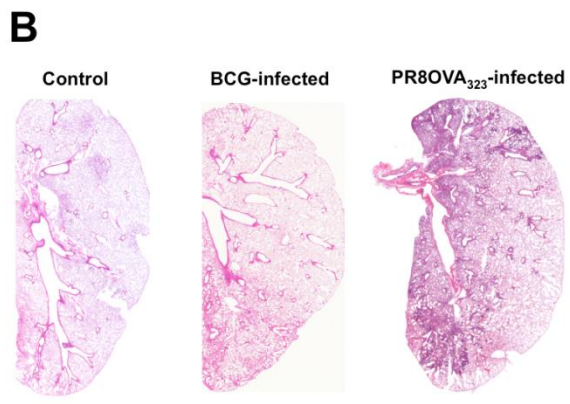

**Figure S2: Time course of BCG infection and gross pathology associated with BCG and PR8OVA<sub>323</sub> infection.** *A*, LysM-EGFP mice were infected with  $5 \times 10^3$  CFUs BCG expressing the red fluorescent protein (RFP). Lungs were harvested at the indicated time points and confocal images acquired. Images are z stack projections of approximately 40-50 $\mu$ m volumes. Colors of the words correspond to colors in the image. *B*, Representative hematoxylin and eosin stains of the left lobe of an uninfected animal, an animal infected with  $5 \times 10^3$  CFUs BCG 5 months previously, and an animal infected with PR8OVA<sub>323</sub> 7 days previously.

# Supplementary figure 3

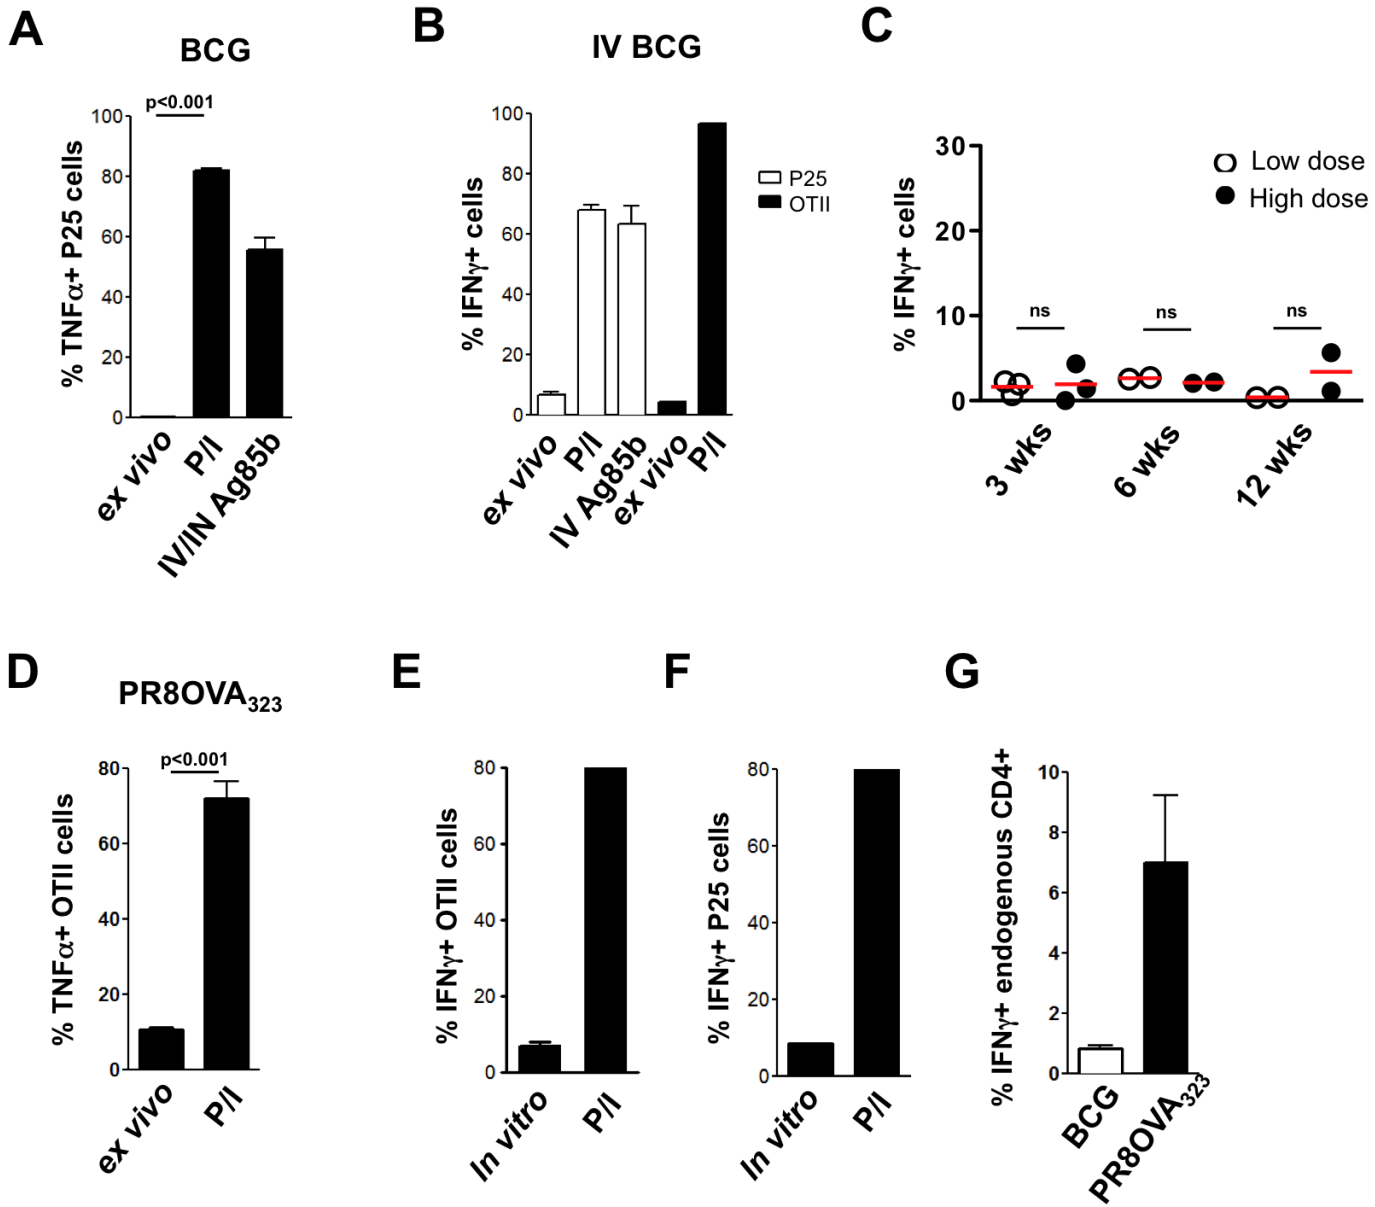

**Figure S3: Cytokine production profile of antigen specific T cells.** *A*, Percentage of P25 T cells producing TNF $\alpha$ , as measured by intracellular cytokine stain, directly *ex vivo* from lungs of BCG-infected mice, without further restimulation. *B*, Quantification of the percentage of IFN $\gamma$ + P25 T cells or OTII T cells, when taken directly *ex vivo* from the lungs of mice infected with  $5 \times 10^5$  CFUs of BCG administered intravenously 2 weeks prior, after 4 hours of *in vitro* PMA+ionomycin (P/I) stimulation, or 2 hours after *in vivo* administration of cognate antigen. *C*, Quantification of the percentage of IFN $\gamma$ + P25 T cells, when taken directly *ex vivo*, at the indicated time points post infection, from the lungs of mice infected with  $5 \times 10^3$  (low dose) or  $5 \times 10^5$  (high dose) CFUs of BCG administered intranasally. Horizontal lines indicate the mean. *D*, Percentage of OTII T cells producing TNF $\alpha$ , as measured by intracellular cytokine stain, directly *ex vivo* from lungs of influenza-infected mice, without further restimulation. *E and F*, Percentage of OTII and P25 T cells producing IFN $\gamma$  prior to transfer into the animals, after 7 days of *in vitro* culture, without further restimulation (*in vitro*) and after PMA+ionomycin stimulation. *G*, Percentage of CD4+ T cells actively secreting IFN $\gamma$  in the lung tissue of mice infected with BCG or PR8OVA<sub>323</sub>, gated on all CD4+ T cells, excluding transferred T cells. Data represented as means with standard error of the mean.

# Supplementary figure 4

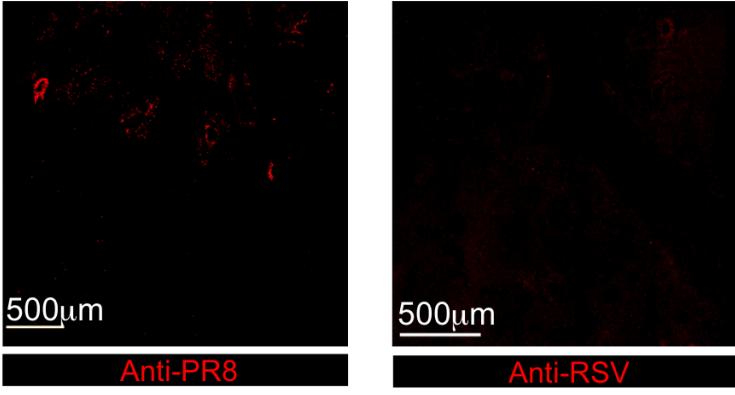

**Figure S4: Influenza-infected lungs stained with anti-PR8 or with anti-RSV antibody as a specificity control.** Immunofluorescent staining of influenza-infected mouse lung with anti-PR8 antibody or anti-RSV antibody, as acquired by confocal microscopy. Colors of the words correspond to colors in the image.
